# Supplementary material for: Osmotic stress-induced somatic embryo maturation of coffee Coffea arabica L., shoot and root apical meristems development and robustness
Source: PubMed Central journal article supplement (PMC8102543; doi:10.1038/s41598-021-88834-z), 2021-05-06
Supplement: 41598_2021_88834_MOESM3_ESM.pdf [file 41598_2021_88834_MOESM3_ESM.pdf]

Osmotic stress-induced somatic embryo maturation of coffee *Coffea arabica* L, shoot and root apical meristems development and robustness.

Eliana Valencia-Lozano<sup>1</sup>, Jorge E. Ibarra<sup>1</sup>, Humberto Herrera-Ubaldo<sup>3</sup>, Stefan De Folter<sup>3</sup>, José L. Cabrera-Ponce<sup>2\*</sup>

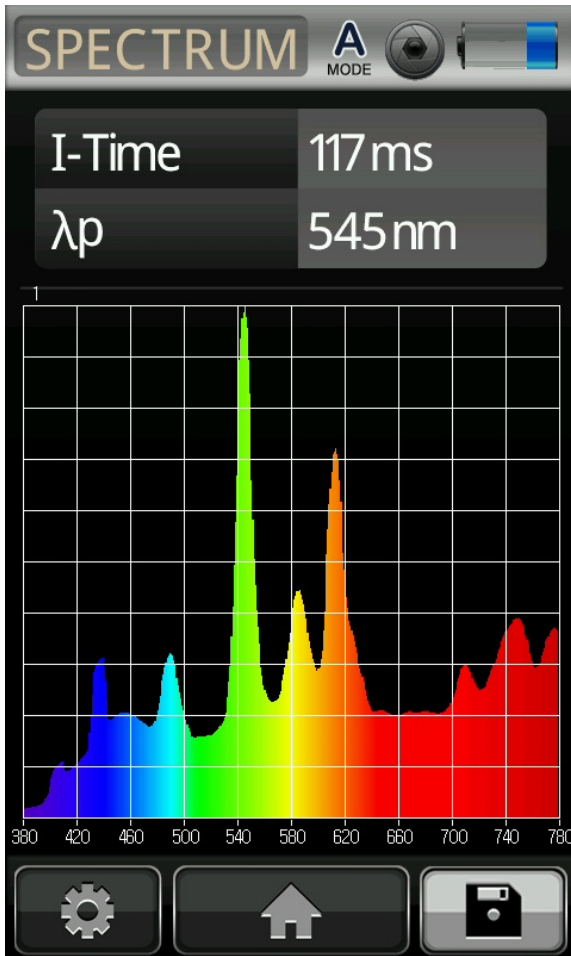

**Supplementary Figure 1.** Light spectrum used for SEs maturation and conversión to plantlet of *C. arabica* var. Typica.

Osmotic stress-induced somatic embryo maturation of coffee *Coffea arabica* L, shoot and root apical meristems development and robustness.

Eliana Valencia-Lozano<sup>1</sup>, Jorge E. Ibarra<sup>1</sup>, Humberto Herrera-Ubaldo<sup>3</sup>, Stefan De Folter<sup>3</sup>, José L. Cabrera-Ponce<sup>2\*</sup>

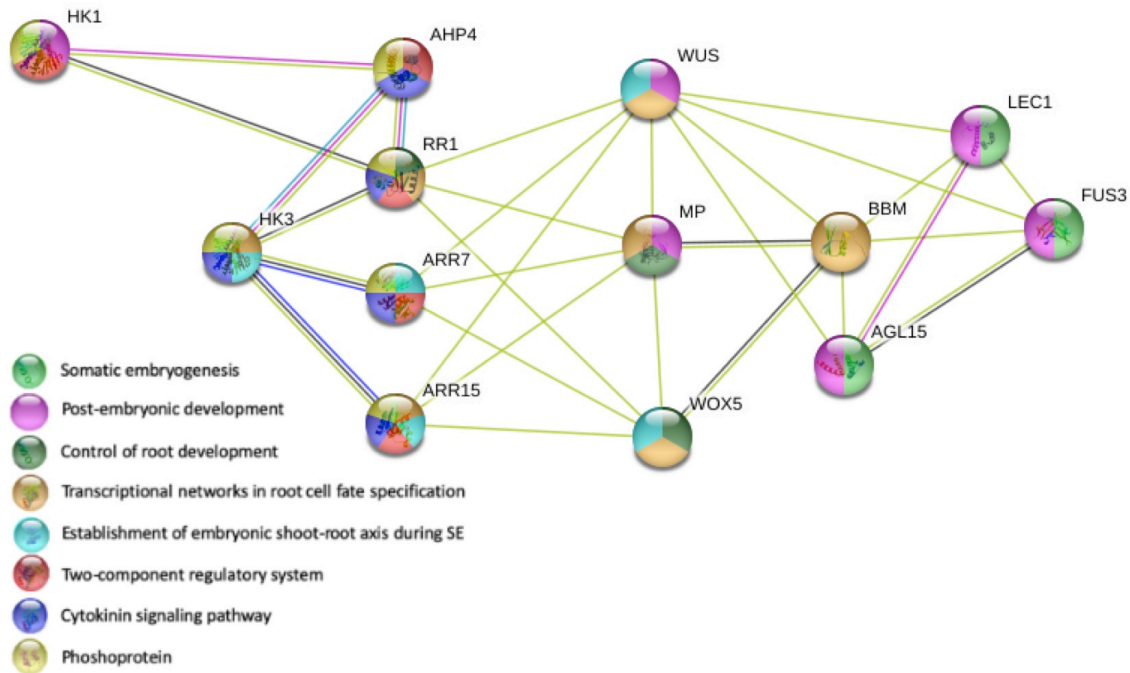

**Supplementary Figure 2.** Gene network using STRING database with high confidence (0.700) of two component and cytokinin signaling genes, AHK1, AHK3, AHP4, ARR1, ARR7, ARR15, Auxin signaling; ARF5 (Monopteros), homeodomains and master regulators of SE.

Osmotic stress-induced somatic embryo maturation of coffee *Coffea arabica* L, shoot and root apical meristems development and robustness.

Eliana Valencia-Lozano<sup>1</sup>, Jorge E. Ibarra<sup>1</sup>, Humberto Herrera-Ubaldo<sup>3</sup>, Stefan De Folter<sup>3</sup>, José L. Cabrera-Ponce<sup>2\*</sup>

**Supplementary Table 1.** Sequence primer qPCR and protein function of genes analyzed during SEs in *C. arabica* var. Typica.

| Gene  | ID AT<br>( <i>A. thaliana</i> ) | ID XP<br>( <i>C. arabica</i> ) | Protein function                                                                                                                                                                                                                                                                     | % ID<br>At/Ca | Primer                                                     |
|-------|---------------------------------|--------------------------------|--------------------------------------------------------------------------------------------------------------------------------------------------------------------------------------------------------------------------------------------------------------------------------------|---------------|------------------------------------------------------------|
| AHK1  | AT2G17820.1                     | XP_027075540                   | Histidine kinase 1; Functions as an osmosensor histidine kinase that detects water stress and transmits the stress signal to a downstream MAPK cascade.                                                                                                                              | 64.07         | 5' CTTAGCAGCGGGAAGTGTTC 3'<br>3' CCATGCCAAGCGAGTAGTTGA 5'  |
| AHK3  | AT1G27320.1                     | XP_027097259                   | Histidine kinase 3; Cytokinins (CK) receptor related to bacterial two-component regulators.                                                                                                                                                                                          | 67.12         | 5' TGGAAGATGGAGAGGATTTGG 3'<br>3' ATTCCCACGATCTTCCTGTG 5'  |
| AHP4  | AT3G16360                       | XP_027125278                   | <i>Arabidopsis thaliana</i> histidine phosphotransfer proteins (AHPs). Encodes AHP4, a histidine-containing phospho-transmitter involved in Histidine (His)-to-Aspartate (Asp) phosphorelay signal transduction. AHP4 is one of the six                                              | 70.34         | 5' TCAACTGCGACGAAAAGTTG 3'<br>3' GGTTCTTCTCCAGTGCTTGC 5'   |
| ARR1  | AT3G16857.2                     | XP_027115945                   | Two-component response regulator ARR1; Transcriptional activator that response regulator involved in His-to-Asp phosphorelay signal transduction system.                                                                                                                             | 52.11         | 5' TTGCCCGGTAATAGTTTTGC 3'<br>3' CATTTTGCATACCCCAATCC 5'   |
| ARR7  | AT1G19050.1                     | XP_027098055.1                 | Arabidopsis response regulator (ARR) family, most closely related to ARR15. A two-component response regulator protein containing a phosphate accepting domain in the receiver domain but lacking a DNA binding domain in the output domain.                                         | 63.35         | 5'AGGGTTTGGCAAGAGAAAATTG 3'<br>3'AGTTTGTGTTGGTGAGGAG 5'    |
| ARR15 | AT1G74890.1                     | XP_027065231.1                 | Two-component response regulator ARR15; Functions as response regulator involved in His-to-Asp phosphorelay signal transduction system. Phosphorylation of the Asp residue in the receiver domain activates the ability of the protein to promote the transcription of target genes. | 50.85         | 5' GTGGGTTGTGGATTTTGGTG 3'<br>3'GTATGAGCTGAGGTGAGATGAG 5'  |
| WUS   | AT2G17950.1                     | XP_027100463.1                 | Homeodomain-like superfamily protein; Transcription factor that plays a central role during early embryogenesis, oogenesis and flowering. Required to specify stem cell identity in meristems, such as shoot apical meristem (SAM).                                                  | 40.4          | 5' CCGGTCCAGAAATTAGAAACTC 3'<br>3'GAATAACCCACGTTGCCATTG 5' |
| WOX5  | AT3G11260.1                     | XP_027109768.1                 | WUSCHEL related homeobox 5; Transcription factor, which may be involved in the specification and maintenance of the stem cells (QC cells) in the root apical meristem (RAM)                                                                                                          | 58.54         | 5' TCGCAGAGTTTCGATTGATG 3'<br>3' GCTGCTTCTCTGCCTCTGAT 5'   |
| ARF5  | AT1G19850.1                     | XP_027090708.1                 | Transcriptional factor B3 family protein / auxin-responsive factor AUX/IAA-related; Auxin response factors (ARFs) are transcriptional factors that bind specifically to the DNA sequence.                                                                                            | 58.01         | 5'CAATTGAGCGGATGTTTGGAC 3'<br>3'TCCACATACACCAGTTTCAG 5'    |
| LEC1  | AT1G21970.1                     | XP_027085797                   | Nuclear transcription factor Y subunit B-9; Transcriptional activator of genes required for both embryo maturation and cellular differentiation. Sequence is similar to HAP3.                                                                                                        | 76.47         | 5' CCAGGAATGTGTATCGGAGTAC 3'<br>3'GAAAGCGGTGGAGATATAGGG 5' |
| BBM   | AT5G17430                       | XP_027062561                   | AP2-like ethylene-responsive transcription factor BBM; Transcription factor that promotes cell proliferation, differentiation and morphogenesis, especially during embryogenesis                                                                                                     | 41.53         | 5' TTCAACCCCAACGAGATCAG 3'<br>3'GTTGTAGTTCTCCTCCAGTCC 5'   |
| FUS3  | AT3g26790.1                     | XP_027102113.1                 | Transcriptional factor with high similarity to the B3 region of the VP1/ABI3-like proteins. Present in many seed-specific promoters.                                                                                                                                                 | 44.92         | 5'GGCTTACGACATGGAGACTAC 3'<br>3'GCATTTATCTCCGACTCAGGG 5'   |
| AGL15 | AT5G13790.1                     | XP_027113896.1                 | AGL15 (AGAMOUS-Like 15) is a member of the MADS domain family of regulatory factors. Is preferentially expressed during embryogenesis, may play a role during post-germinative development.                                                                                          | 55.77         | 5' TGGGAGGAAGAATTCTGCTG 3'<br>3'CTAACAGGCCAAACACGCTGA 5'   |

Osmotic stress-induced somatic embryo maturation of coffee *Coffea arabica* L, shoot and root apical meristems development and robustness.

Eliana Valencia-Lozano<sup>1</sup>, Jorge E. Ibarra<sup>1</sup>, Humberto Herrera-Ubaldo<sup>3</sup>, Stefan De Folter<sup>3</sup>, José L. Cabrera-Ponce<sup>2\*</sup>

**Supplementary Table 2.** Genes involved in SEs maturation of *C. arabica* identified from differentially expressed genes (DEGs).

| <b>Non-osmotic stress M3</b> | <b>osmotic stress M9</b> | <b>GENE ID</b> | <b>Annotation in the <i>Coffea arabica</i> genome</b> |
|------------------------------|--------------------------|----------------|-------------------------------------------------------|
| 0.25                         | 2.29                     | AHK1           | XP_027075540                                          |
| 1.12                         | -0.27                    | AHK3           | XP_027097259                                          |
| -1.47                        | 1.94                     | AHP4           | XP_027125278                                          |
| -3.84                        | 4.22                     | ARR1           | XP_027115945                                          |
| 1.32                         | -3.13                    | ARR7           | XP_027098055.1                                        |
| 0.68                         | -2.69                    | ARR15          | XP_027065231.1                                        |
| -2                           | 1.89                     | ARF5           | XP_027090708.1                                        |
| -5.06                        | 3.53                     | WUS            | XP_027100463.1                                        |
| -0.79                        | 5.06                     | WOX5           | XP_027109768.1                                        |
| -6.64                        | 5.81                     | LEC1           | XP_027085797                                          |
| -5.64                        | 4.27                     | FUS3           | XP_027102113.1                                        |
| -5.06                        | 4.36                     | BBM            | XP_027062561                                          |
| 0.95                         | 2.15                     | AGL15          | XP_027113896.1                                        |

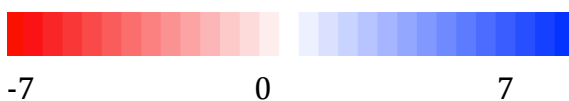

\*SE-M3: Embryogenic medium with 3 g/L gelrite; SE.M9: Embryogenic medium with 9 g/L gelrite. See text and Table S1 for the identification of genes.
